# Supplementary material for: Follow-Up Timing After Discharge and Suicide Risk Among Patients Hospitalized With Psychiatric Illness
Source: PubMed Central journal article supplement (PMC10562943; doi:10.1001/jamanetworkopen.2023.36767), 2023-10-09
Supplement: jamanetwopen-e2336767-s001.pdf [file jamanetwopen-e2336767-s001.pdf]

## Data Sharing Statement

Che. Follow-Up Timing After Discharge and Suicide Risk Among Patients Hospitalized With Psychiatric Illness. *JAMA Netw Open*. Published October 09, 2023.

doi:10.1001/jamanetworkopen.2023.36767

### Data

**Data available:** No

### Additional Information

**Explanation for why data not available:** The datasets generated and/or analyzed during the current study are not publicly available due to HIRA's policy.
